# Supplementary material for: Poly(diallyldimethylammonium)-based solid electrolytes to significantly enhance the power factor of a thermoelectric oxide film (Sb-doped SnO2)
Source: Royal Society of Chemistry journal article supplement (doi:10.1039/d4se01471e), 2025-01-01
Supplement: d4se01471e1.pdf [file d4se01471e1.pdf]

Supplementary information

**Poly(diallyl dimethylammonium)-based solid electrolytes to significantly  
enhance the power factor of a thermoelectric oxide film**

*M. Solis-de la Fuente<sup>1</sup>, S. Castro-Ruiz<sup>1</sup>, L. Márquez-García<sup>1</sup>, P. Rullière<sup>2</sup>, S.  
Fantini<sup>2</sup>, R. Del Olmo<sup>3</sup>, N. Casado<sup>3,4</sup>, J. García-Cañadas<sup>1\*</sup>*

<sup>1</sup>*Department of Industrial Systems Engineering and Design, Universitat Jaume I, Av.  
Vicent Sos Baynat s/n, 12006 Castelló de la Plana, Spain.*

<sup>2</sup>*Solvionic SA, 11 Chemin des Silos, 31100 Toulouse, France.*

<sup>3</sup>*POLYMAT, University of the Basque Country UPV/EHU, Joxe Mari Korta Center,  
20018 Donostia-San Sebastián, Spain*

<sup>4</sup>*IKERBASQUE, Basque Foundation for Science, 48013 Bilbao, Spain.*

\*Corresponding author e-mail: [garciaj@uji.es](mailto:garciaj@uji.es)

Table S1. Elemental composition of an Sb:SnO<sub>2</sub> film.

| Element | Weight% | Atomic% |
|---------|---------|---------|
| Sn      | 71.38   | 30.50   |
| Sb      | 7.83    | 3.30    |
| O       | 20.79   | 66.20   |

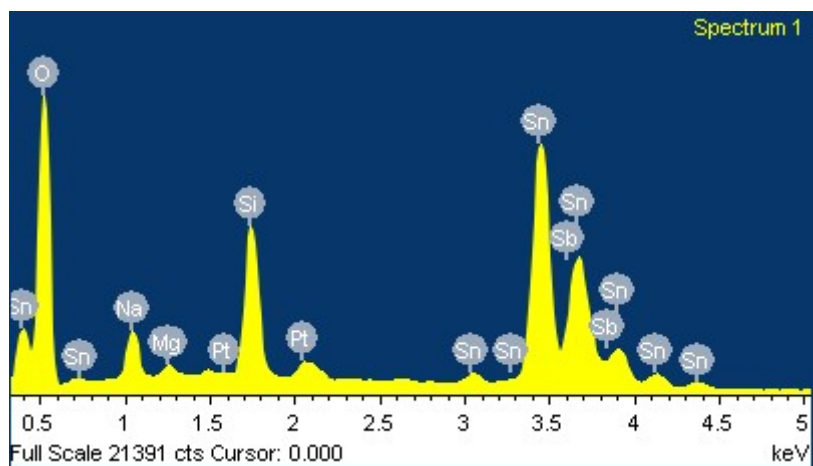

Fig. S1. EDX spectrum of an Sb:SnO<sub>2</sub> film.

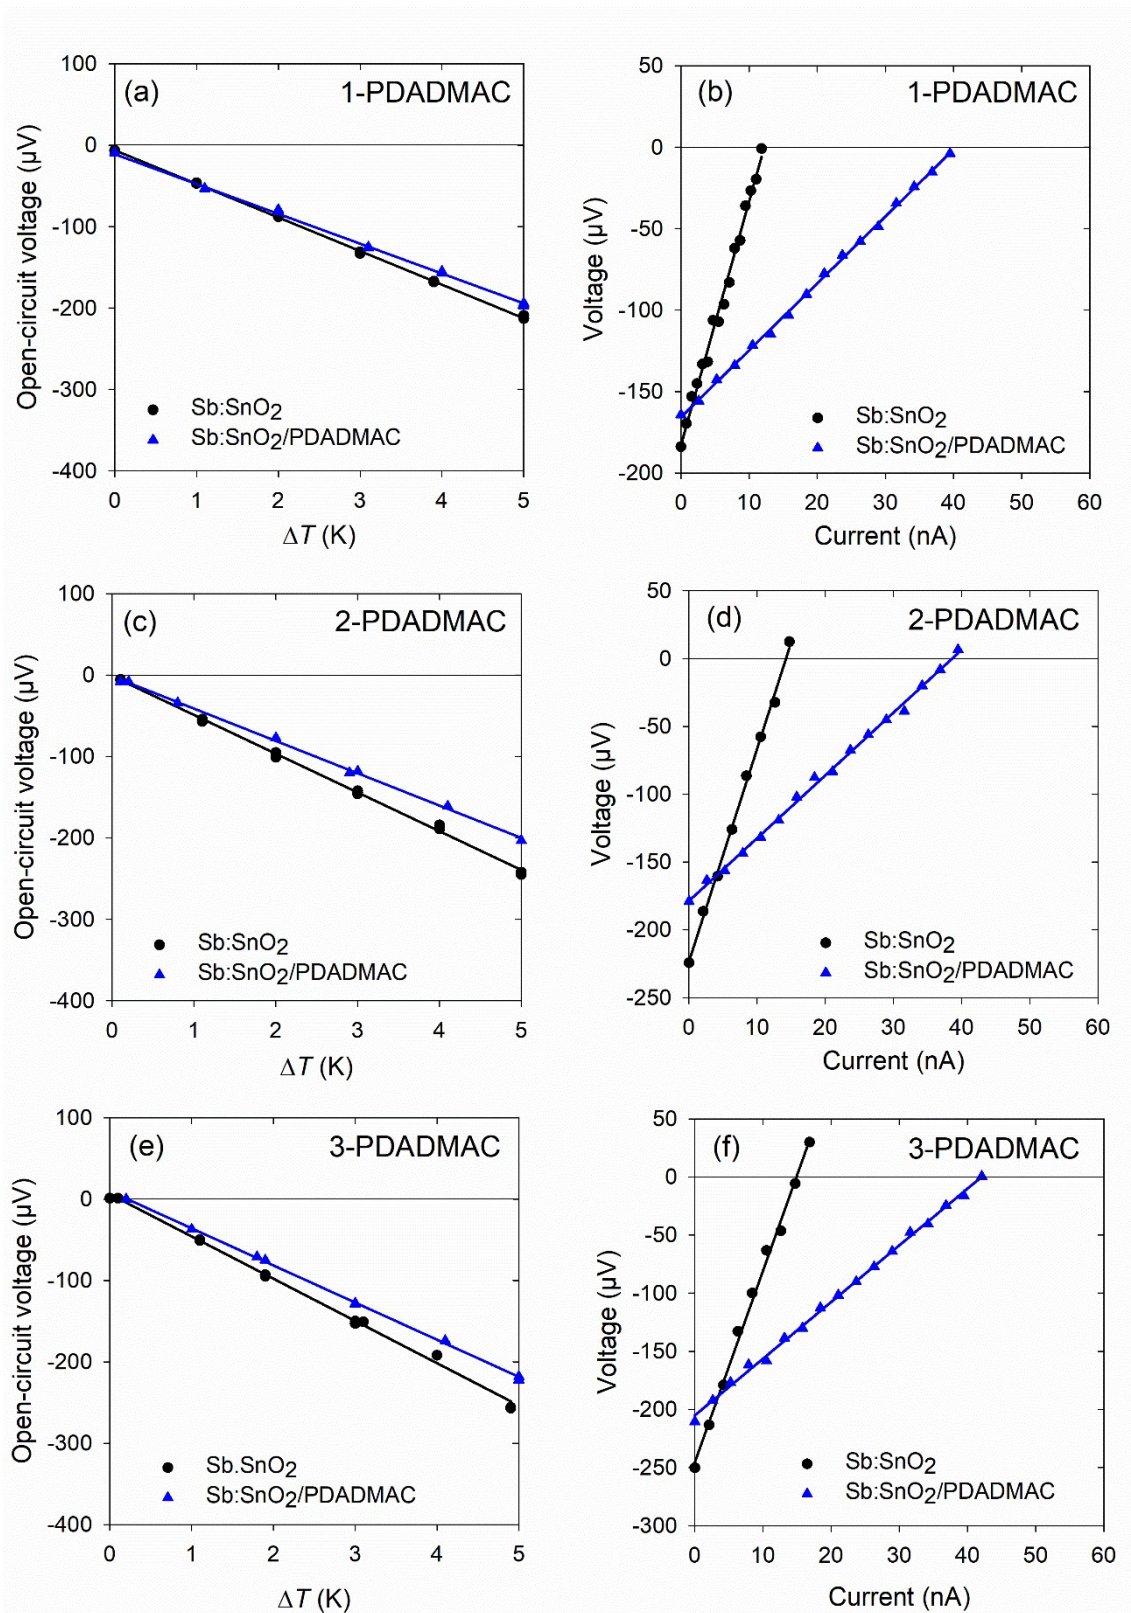

Fig. S2. (a, c, e) Open-circuit voltage vs temperature difference plots and (b, d, f) current-voltage curves for three Sb:SnO<sub>2</sub> films before and after PDADMAC addition.

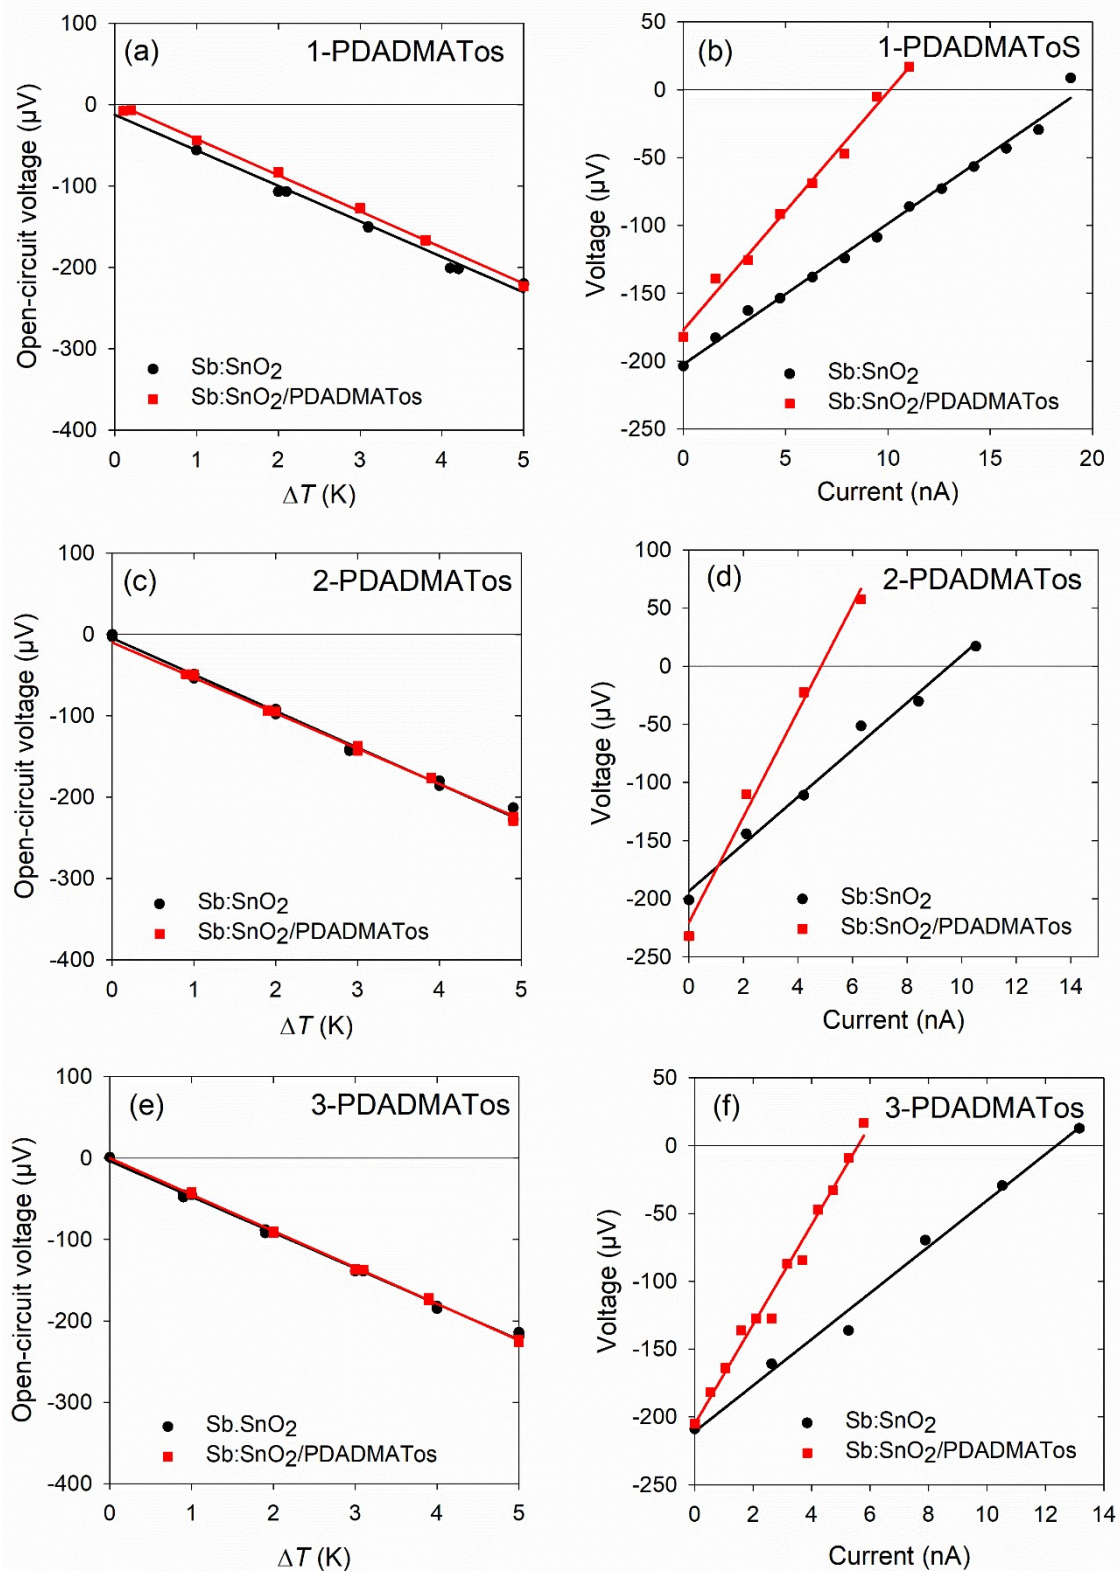

Fig. S3. (a, c, e) Open-circuit voltage vs temperature difference plots and (b, d, f) current-voltage curves for three Sb:SnO<sub>2</sub> films before and after PDADMATos addition.

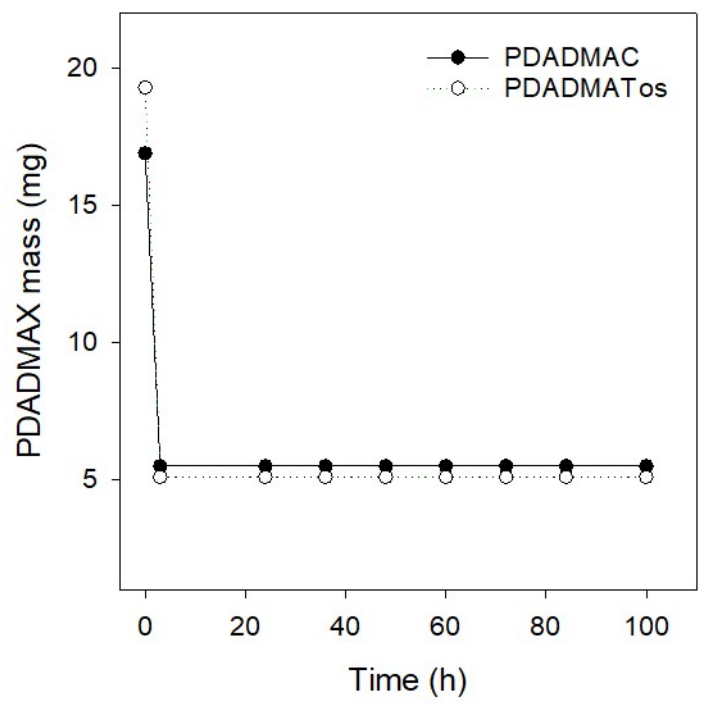

Fig. S4. Mass monitoring of the PDADMAX polyelectrolytes.



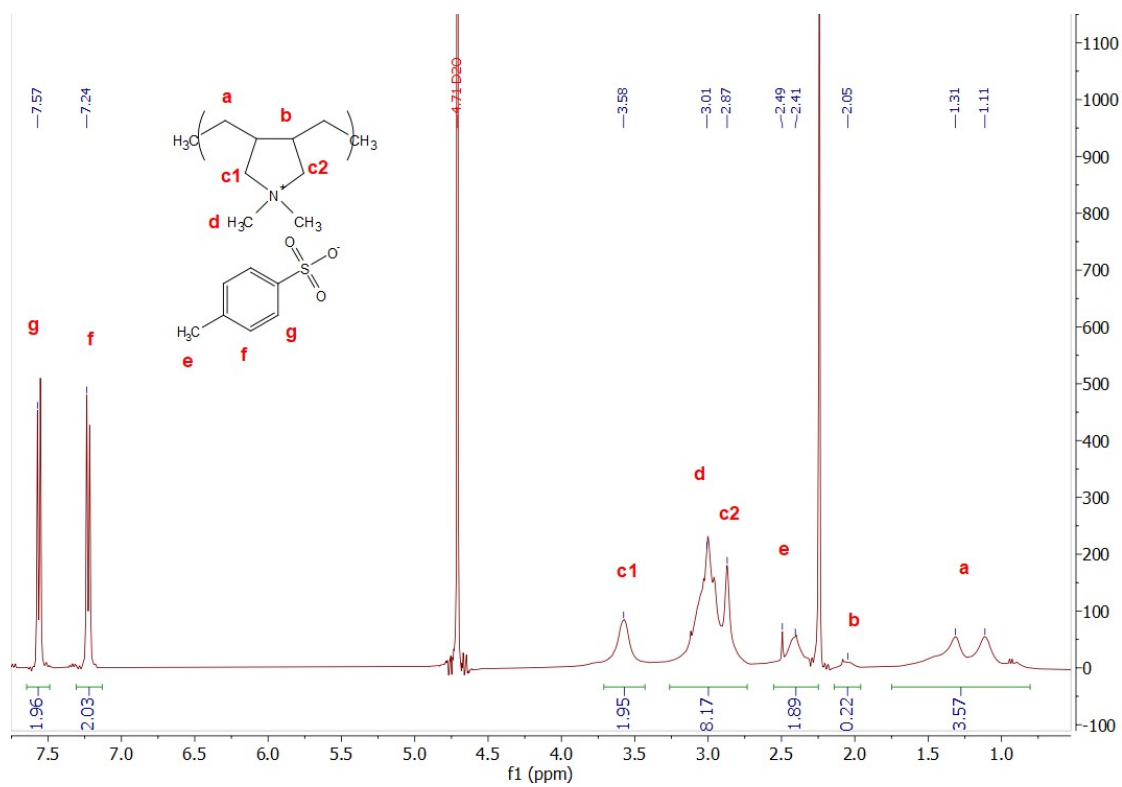

Fig. S5. <sup>1</sup>H-NMR spectrum of PDADMATos.

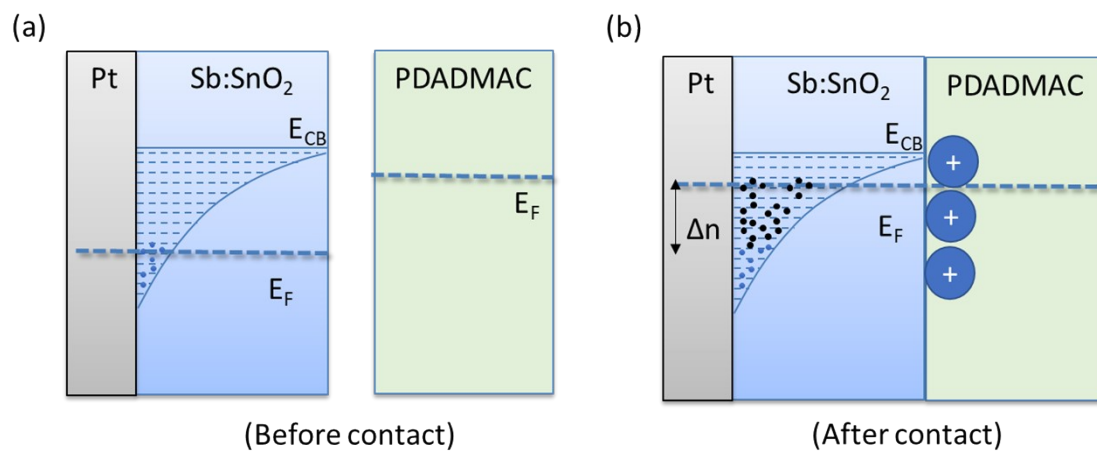

Fig. S6. Energy diagram (a) before and (b) after the equilibration of Sb:SnO<sub>2</sub> with PDADMAC.
